# Supplementary material
Source: Springer Nature journal article supplement (https://www.springermedizin.de/resource/supplementary/13045_2011_142_MOESM1_ESM.pdf/9660850)

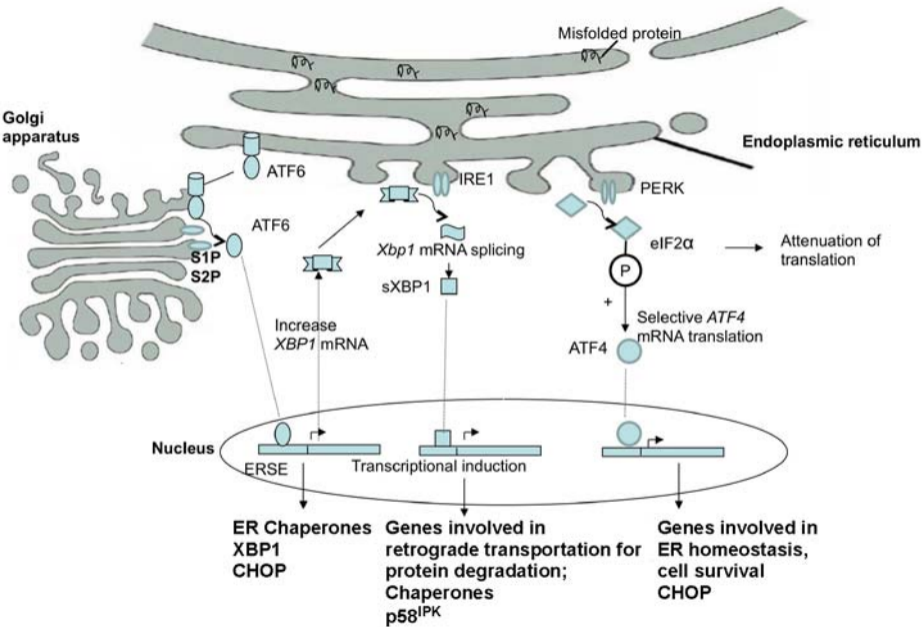

Supplement: MOESM1 [file 9660850]
